# Supplementary material for: Volumetric Quantitative Ablation Margins for Assessment of Ablation Completeness in Thermal Ablation of Liver Tumors
Source: Frontiers journal article supplement (doi:10.3389/fonc.2021.623098), 2021-03-10

# Supplementary Material

## Artificial examples and results for non-subcapsular tumors

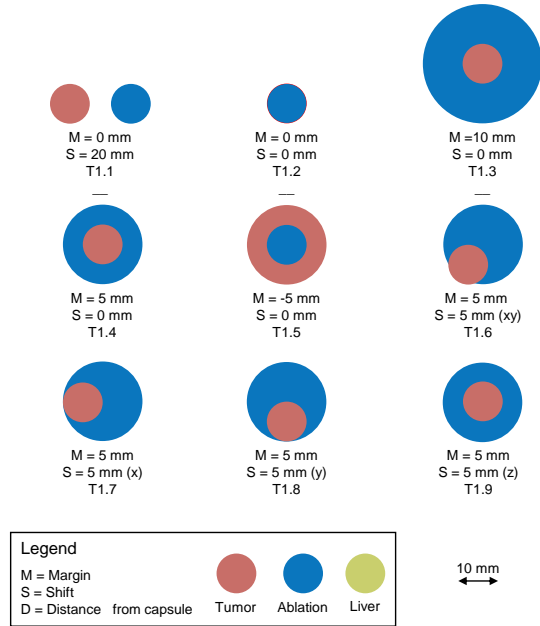

Figure 1: Artificial examples of non-subcapsular tumors

## Numerical Results

| Case | Euclidean distance (mm) |                             |        |                             |        | Percentage of tumor surface covered at x surface distances (mm) |                |            |
|------|-------------------------|-----------------------------|--------|-----------------------------|--------|-----------------------------------------------------------------|----------------|------------|
|      | Min                     | 25 <sup>th</sup> percentile | Median | 75 <sup>th</sup> percentile | Max    | $x < 0$                                                         | $x \geq 0 < 5$ | $x \geq 5$ |
| T1.1 | -20.00                  | -17.58                      | -15.65 | -13.64                      | -10.00 | 100.00%                                                         | 0.00%          | 0.00%      |
| T1.2 | 0.00                    | 0.00                        | 0.00   | 0.00                        | 0.00   | 0.00%                                                           | 100.00%        | 0.00%      |
| T1.3 | 9.06                    | 9.64                        | 9.70   | 9.95                        | 10.00  | 0.00%                                                           | 0.00%          | 100.00%    |
| T1.4 | 4.12                    | 4.58                        | 4.69   | 5.00                        | 5.00   | 0.00%                                                           | 67.57%         | 32.43%     |
| T1.5 | -5.20                   | -5.10                       | -4.90  | -4.58                       | -4.12  | 100.00%                                                         | 0.00%          | 0.00%      |
| T1.6 | -2.24                   | -1.00                       | 1.00   | 3.00                        | 7.00   | 27.93%                                                          | 62.16%         | 9.91%      |
| T1.7 | 0.00                    | 1.00                        | 2.83   | 4.36                        | 9.06   | 0.00%                                                           | 79.73%         | 20.27%     |
| T1.8 | 0.00                    | 1.00                        | 2.83   | 4.36                        | 9.06   | 0.00%                                                           | 79.73%         | 20.27%     |
| T1.9 | 0.00                    | 1.00                        | 2.83   | 4.36                        | 9.06   | 0.00%                                                           | 79.73%         | 20.27%     |

Graphical results

T1.1

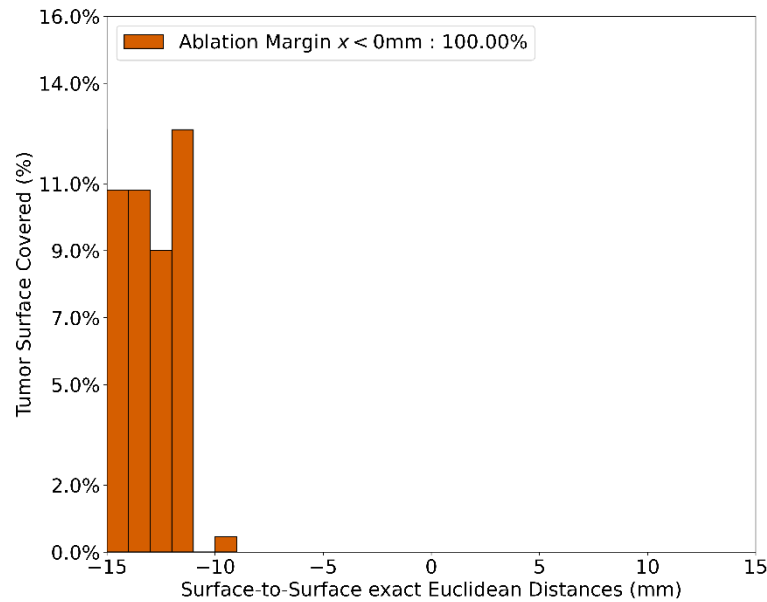

T1.2

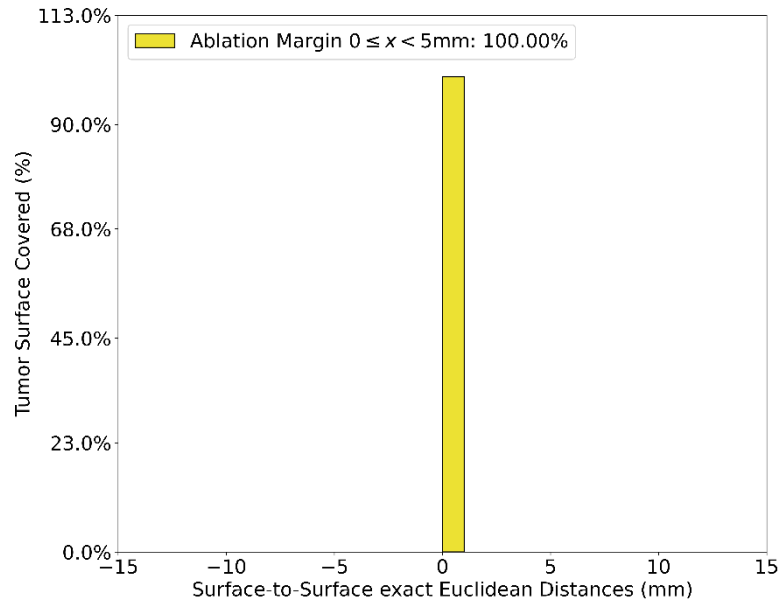

T1.3

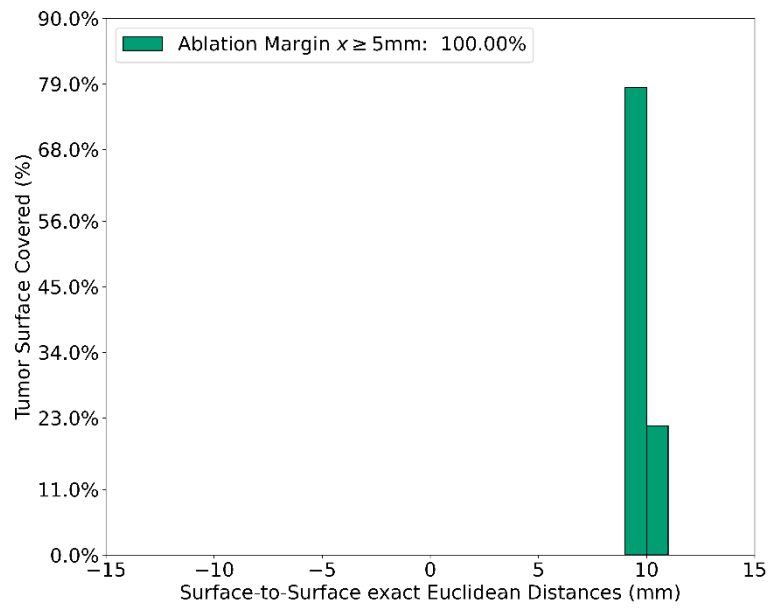

T1.4

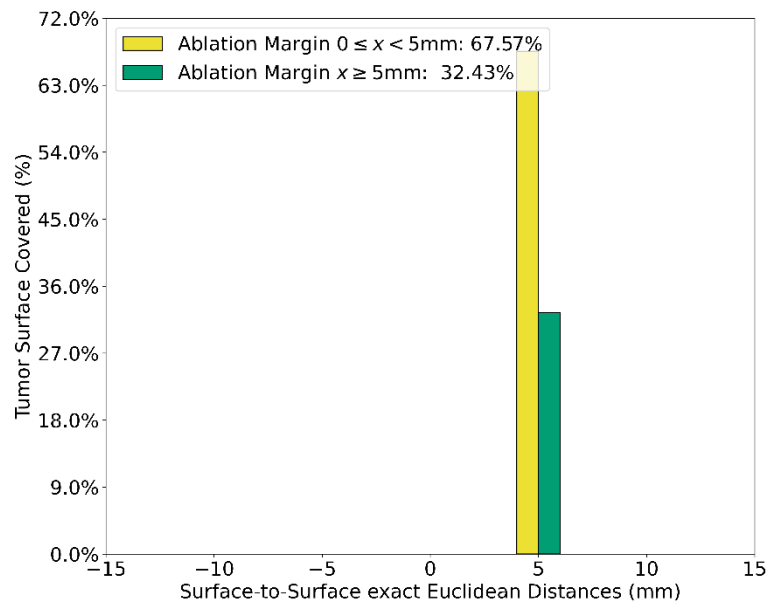

T1.5

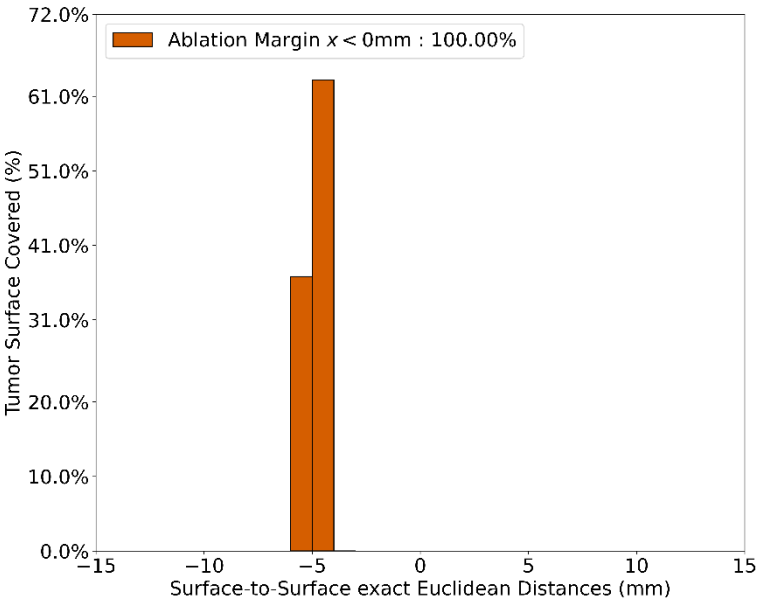

T1.6

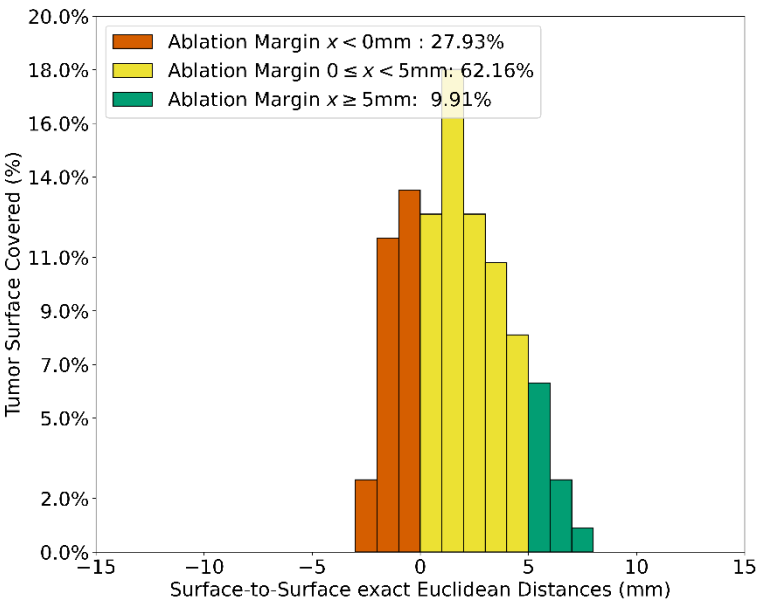

T1.7

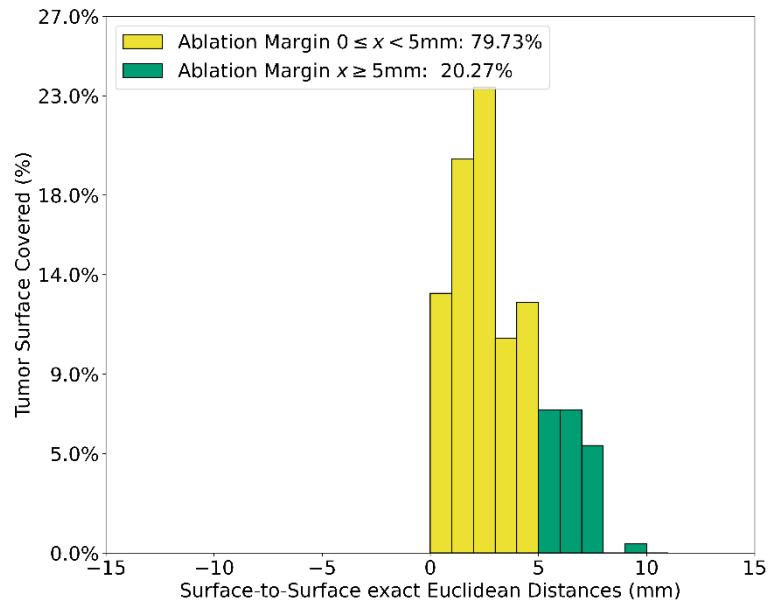

T1.8

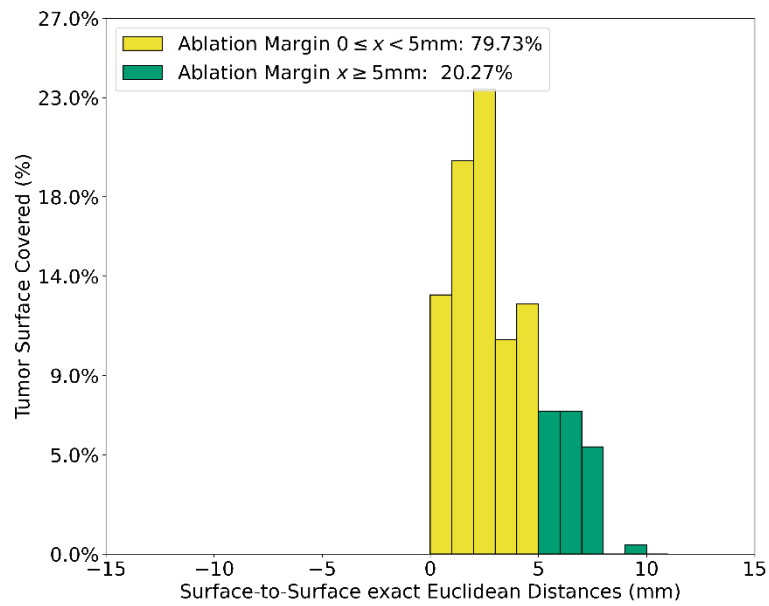

T1.9

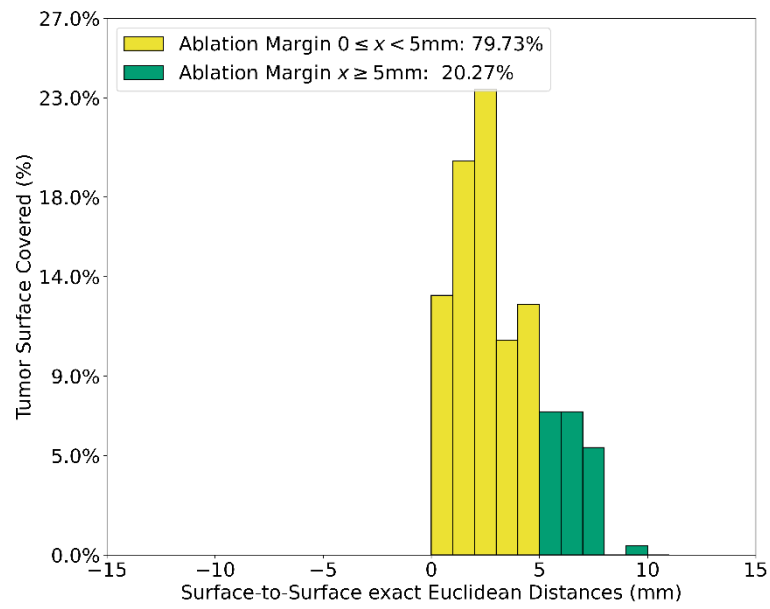

## Artificial examples and results for subcapsular tumors

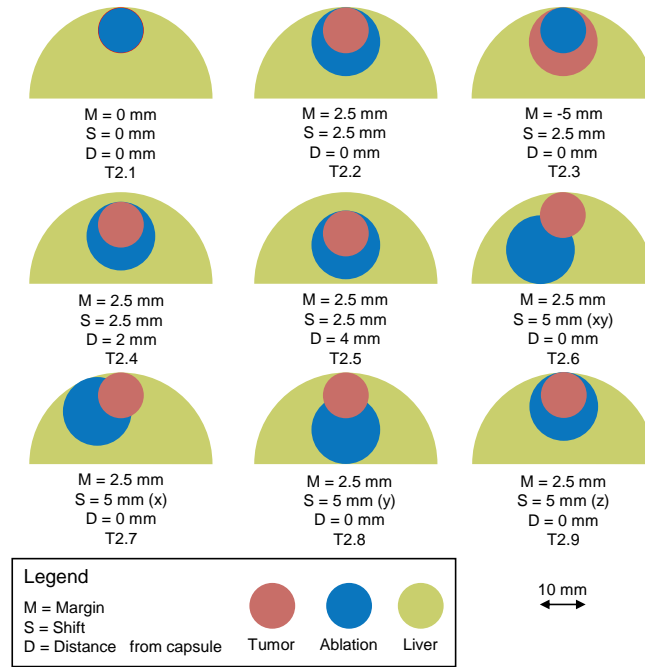

Figure 2: Artificial examples of subcapsular tumors

Table 2. Quantitative ablation margins (QAM) for results for synthetic subcapsular tumors

| Case | Euclidean distance (mm) |                             |        |                             |       | % of tumor surface covered at x surface distances (mm) |           |       |
|------|-------------------------|-----------------------------|--------|-----------------------------|-------|--------------------------------------------------------|-----------|-------|
|      | Min                     | 25 <sup>th</sup> percentile | Median | 75 <sup>th</sup> percentile | Max   | x < 0                                                  | x ≥ 0 < 5 | x ≥ 5 |
| T2.1 | 0.00                    | 0.00                        | 0.00   | 0.00                        | 0.00  | 0.00%                                                  | 100.00%   | 0.00% |
| T2.2 | 2.24                    | 2.45                        | 3.00   | 3.74                        | 5.00  | 0.00%                                                  | 95.88%    | 4.12% |
| T2.3 | -5.10                   | -4.24                       | -3.74  | -3.16                       | -2.24 | 100.00%                                                | 0.00%     | 0.00% |
| T2.4 | 1.41                    | 1.73                        | 2.45   | 3.16                        | 5.00  | 0.00%                                                  | 97.32%    | 2.68% |
| T2.5 | 0.00                    | 1.41                        | 2.24   | 3.00                        | 5.00  | 0.00%                                                  | 97.93%    | 2.07% |
| T2.6 | -3.00                   | -1.00                       | 1.00   | 2.45                        | 4.47  | 32.99%                                                 | 67.01%    | 0.00% |
| T2.7 | -1.00                   | 0.00                        | 1.00   | 2.45                        | 4.12  | 24.74%                                                 | 75.26%    | 0.00% |
| T2.8 | -2.00                   | -1.00                       | 1.00   | 3.00                        | 5.74  | 26.80%                                                 | 68.05%    | 5.15% |
| T2.9 | -2.00                   | -1.00                       | 1.00   | 3.00                        | 5.74  | 26.80%                                                 | 68.05%    | 5.15% |

Results

T2.1

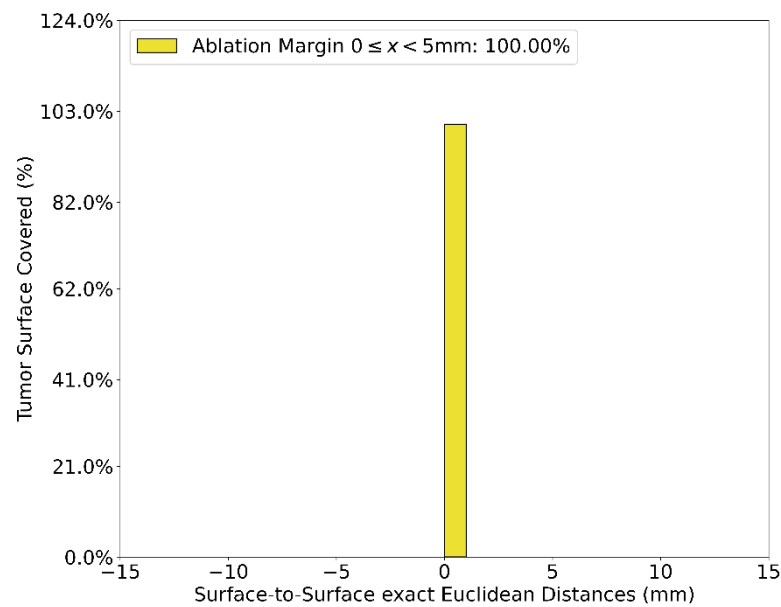

T2.2

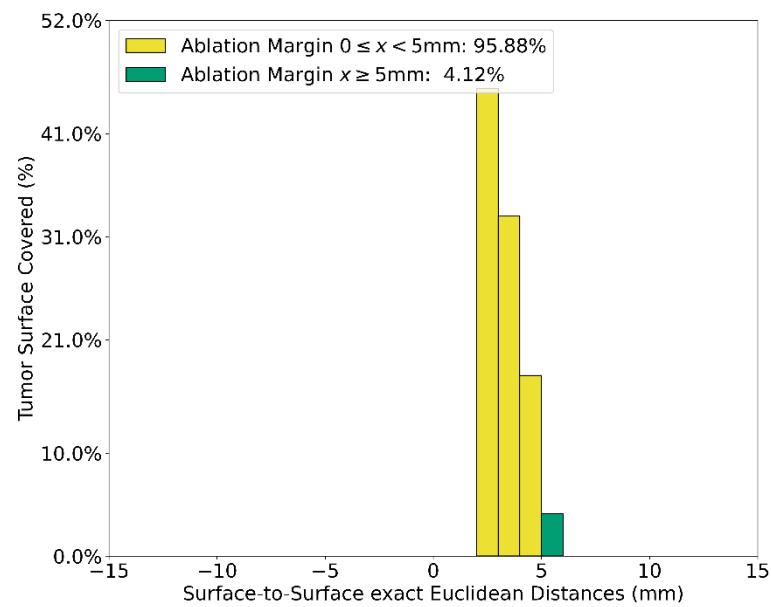



T2.3

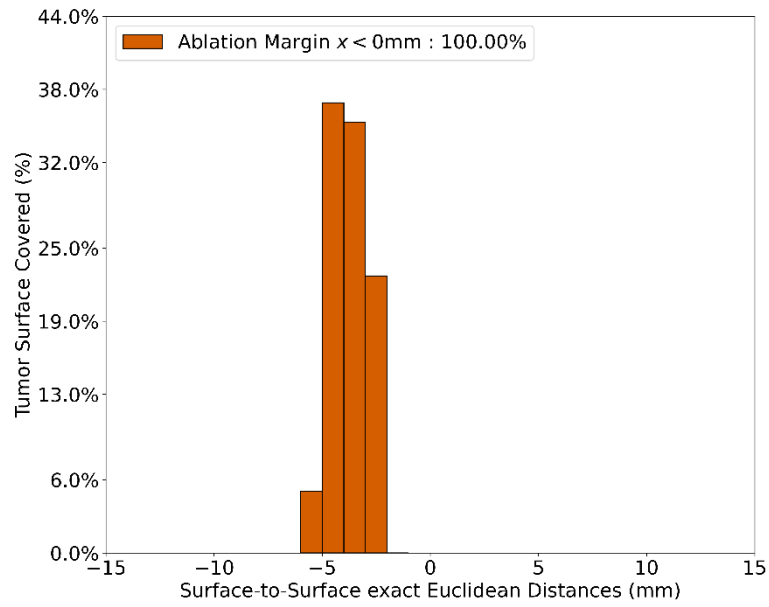

T2.4

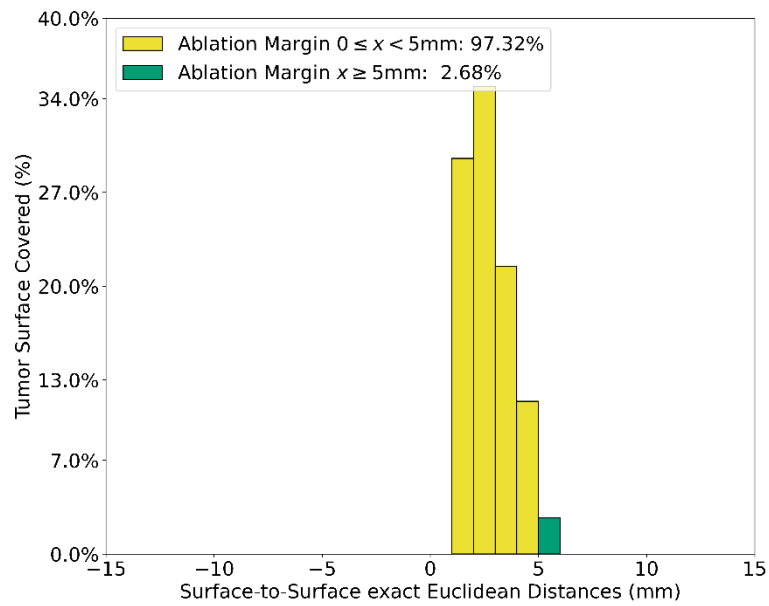

T2.5

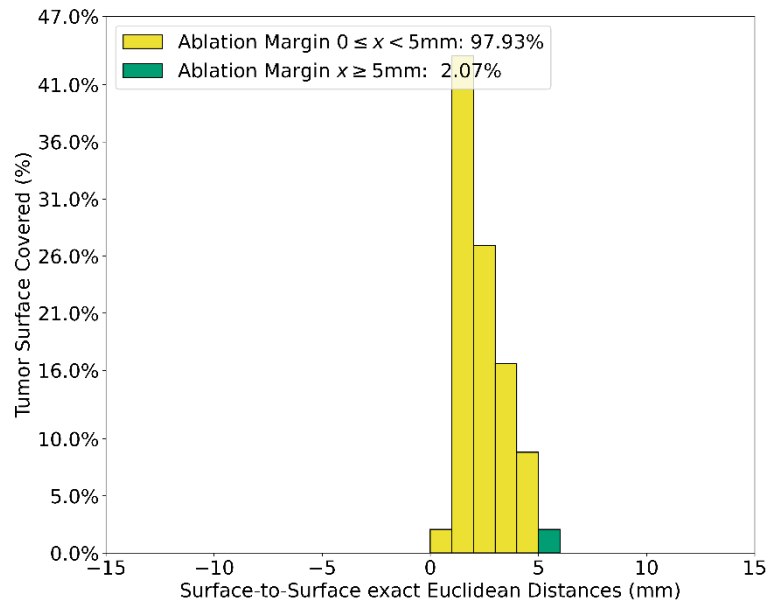

T2.6

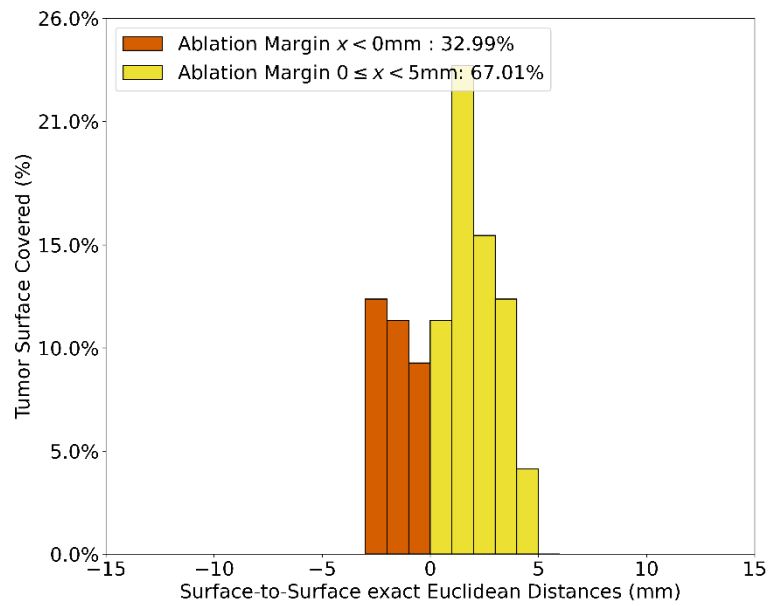

T2.7

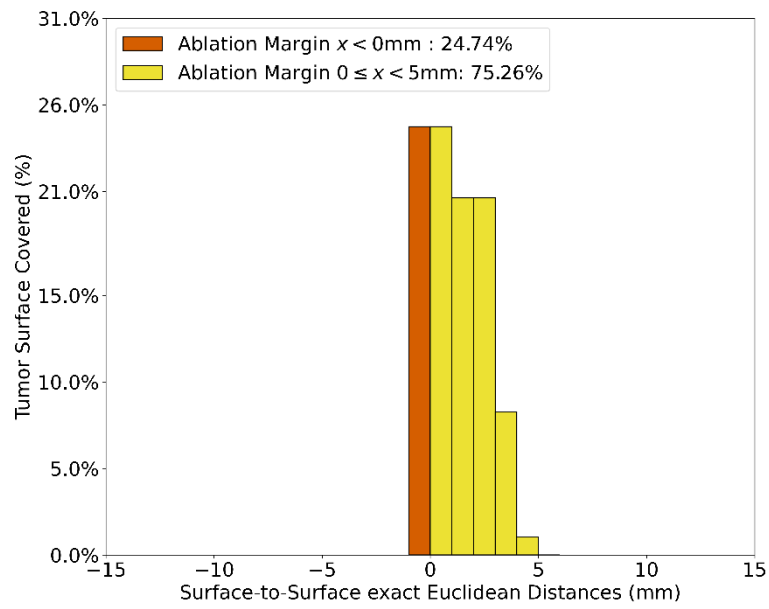

T2.8

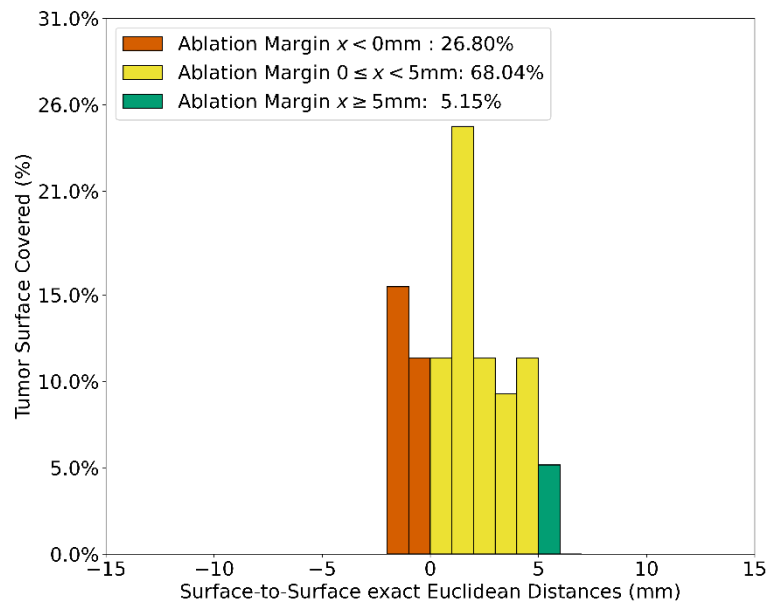

T2.9

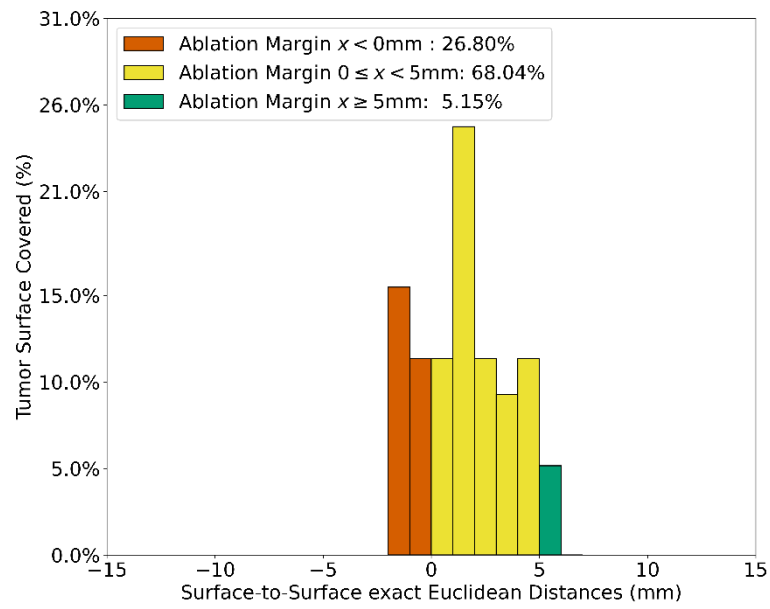

Supplement: Data_Sheet_1.pdf [file Data_Sheet_1.pdf]
